# Supplementary material
Source: Research Square preprint supplement (doi:10.21203/rs.3.rs-9228634/v1)
Supplement: Supplementary file 1 [file 6c5f7a7357fdd33c97177b19.docx]

Table 1. Patients’ characteristics

| Characteristics (N=101) | N (%) |
| --- | --- |
| Age (years) |  |
| >55 | 51 (50.4) |
| ≤55 | 50 (49.6) |
| Sex |  |
| Male | 44 (43.6) |
| Female | 57 (56.4) |
| BM |  |
| With | 83 (82.2) |
| Without | 18 (17.8) |
| LM status |  |
| Primary | 26 (25.7) |
| Secondary | 75 (74.3) |
| Prognosis |  |
| Good | 43 (42.6) |
| Poor | 58 (57.4) |
| EGFR type |  |
| 19-del | 28 (27.7) |
| L858R | 52 (51.5) |
| With T790M | 14 (13.9) |
| L861Q | 4 |
| Unknown | 3 |
| TKI dose |  |
| Standard | 13 (12.9) |
| Escalation | 83 (82.1) |
| Unknown | 5 |
| The type of TKI escalation (N=83) |  |
| Osimertinib 160 mg | 50 (60.2) |
| Almonertinib 165/220 mg | 19 (22.9) |
| Furmonertinib 160/240 mg | 14 (16.9) |
| Local therapy |  |
| iC | 28 (27.7) |
| iR + iC | 25 (24.8) |
| VP + iC | 18 (17.8) |
| iR | 15 (14.9) |
| VP + iR + iC | 12 (11.9) |
| VP | 2 (1.9) |
| VP + iR | 1 (1.0) |

iC: intracranial chemotherapy; iR: cranial radiotherapy; VP: ventriculoperitoneal shunt

Table 2. L-MDT in patients with different prognosis

|  | Poor prognosis | Good prognosis | *P* value |
| --- | --- | --- | --- |
| iC included (n=83) | 51 | 32 | *<0.001* |
| VP included (n=33) | 28 | 5 | *<0.001* |
| iR included (n=53) | 25 | 28 | *0.028* |
